# Supplementary material for: Exploring Core Microbiota Based on Characteristic Flavor Compounds in Different Fermentation Phases of Sufu
Source: MDPI journal article supplement (doi:10.3390/molecules27154933), 2022-08-03

# Exploring Core Microbiota Based on Characteristic Flavor Compounds in Different Fermentation Phases of Sufu

Wu Wei<sup>1#</sup>, Wang Zhuochen<sup>2#</sup>, Xu Boyang<sup>1</sup>, Cai Jing<sup>1</sup>, Cheng Jianghua<sup>2</sup>, Mu Dongdong<sup>1</sup>, Wu Xuefeng<sup>1</sup>, Li Xingjiang<sup>1\*</sup>

<sup>1</sup> School of Food and Biological Engineering, Hefei University of Technology, Hefei, Anhui Province 230009, P.R. China.

<sup>2</sup> Institution of Agricultural Products Processing, Anhui Academy of Agricultural Sciences, Hefei, Anhui Province 230001, China

\*Corresponding Author: Li Xingjiang

\*Email: [lixingjiang1978@hfut.edu.cn](mailto:lixingjiang1978@hfut.edu.cn)

Supplementary Table Guide:

Table S1 Physicochemical parameters values including total acidity, salt content, moisture content and ethanol content in sufu samples, means with different superscript letters are significantly different horizontally (one-way analysis of variance;  $p < 0.05$ )

Figure S1 Wilcoxon rank-sum test bar plot for distinguishing the differences between two stages of sufu fermentation on genus level, significant value are shown as: \*  $p < 0.05$ , \*\*  $p < 0.01$ . The red color represent the early stage, and the blue color represent the late stage

Figure S2 Principal component analysis biplot for assessing the variance of sufu during fermentation

Figure S3 Correlation network analysis of characteristic flavor components and dominant genera in the late stage, the red line represents a positive correlation and the blue line represents a negative correlation

Table S1

|                                | Sufu samples            |                         |                         |                         |                          |                         |                         |
|--------------------------------|-------------------------|-------------------------|-------------------------|-------------------------|--------------------------|-------------------------|-------------------------|
|                                | d0                      | d10                     | d20                     | d30                     | d60                      | d90                     | d130                    |
| Total acidity( <b>g/100g</b> ) | 0.96±0.05 <sup>f</sup>  | 1.16±0.03 <sup>e</sup>  | 1.26±0.03 <sup>d</sup>  | 1.35±0.05 <sup>c</sup>  | 1.47±0.02 <sup>b</sup>   | 1.55±0.05 <sup>a</sup>  | 1.45±0.01 <sup>b</sup>  |
| Moisture(%)                    | 65.37±0.10 <sup>d</sup> | 66.91±0.07 <sup>b</sup> | 68.37±0.03 <sup>a</sup> | 67.03±0.09 <sup>b</sup> | 66.53±0.48 <sup>bc</sup> | 66.03±0.64 <sup>c</sup> | 68.92±0.33 <sup>a</sup> |
| Salt(g/100g)                   | 16.70±0.26 <sup>a</sup> | 14.37±0.28 <sup>d</sup> | 15.32±0.35 <sup>c</sup> | 15.96±0.16 <sup>b</sup> | 15.35±0.26 <sup>c</sup>  | 15.10±0.34 <sup>c</sup> | 15.12±0.32 <sup>c</sup> |
| Ethanol(mg/g)                  | 12.67±0.11 <sup>s</sup> | 18.03±0.27 <sup>c</sup> | 17.52±0.35 <sup>d</sup> | 17.27±0.38 <sup>c</sup> | 16.51±0.16 <sup>f</sup>  | 18.87±0.36 <sup>b</sup> | 20.24±0.21 <sup>a</sup> |

These values were the mean values of three parallel samples.

Figure S1

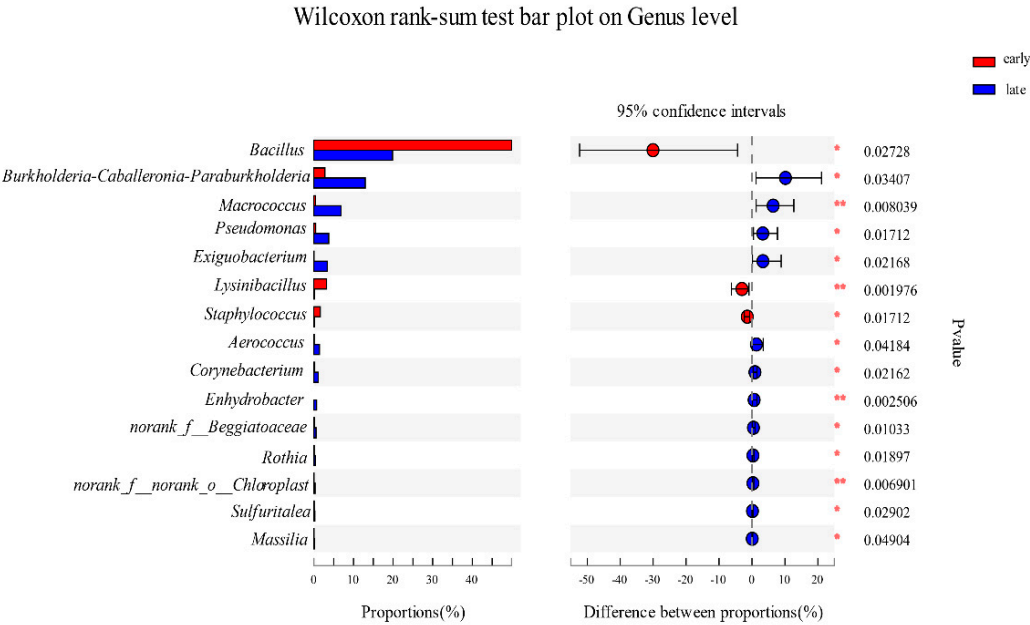

Figure S2

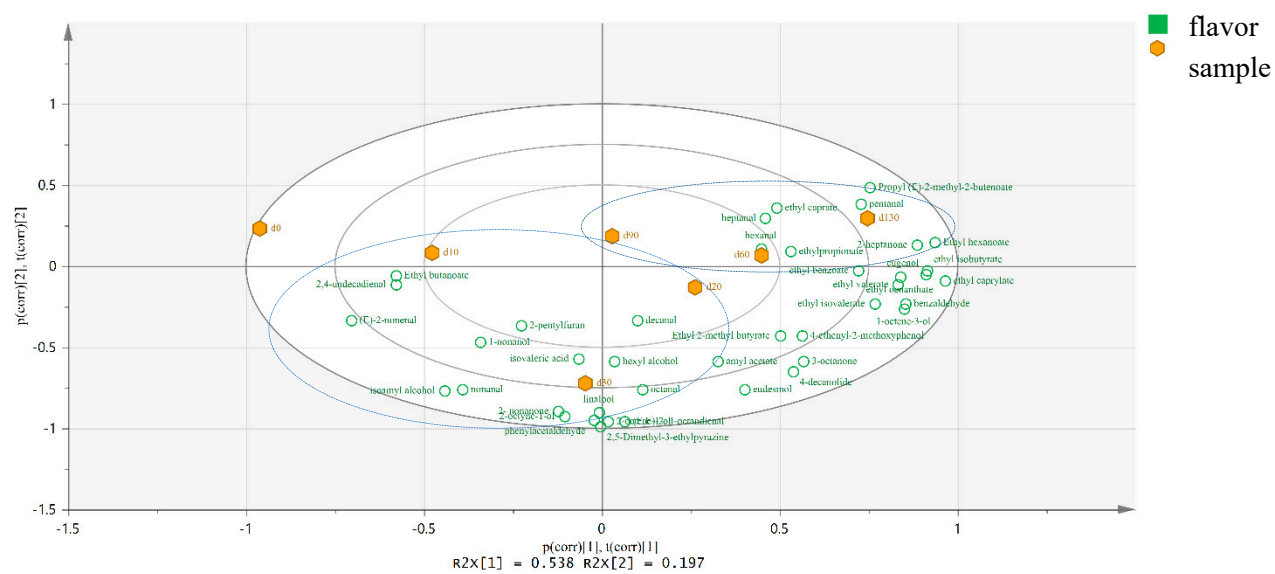

Figure S3

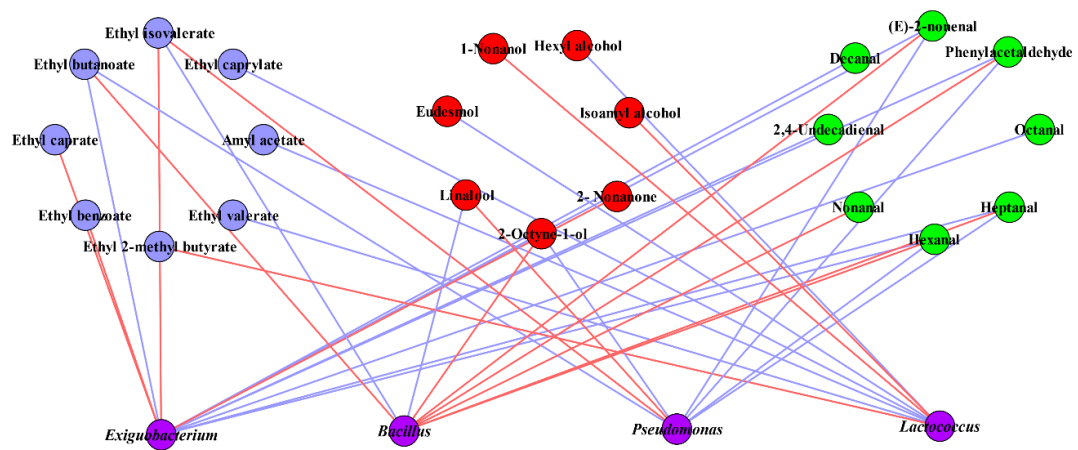

Supplement: s1 [file s1]
